**New!**

# Diagnostic and Statistical Manual of Mental Disorders, Fifth Edition, Text Revision (DSM-5-TR™)

American Psychiatric Association

The *Diagnostic and Statistical Manual of Mental Disorders*, Fifth Edition, Text Revision (DSM-5-TR), is the most comprehensive, current, and critical resource for clinical practice available to today's mental health clinicians and researchers. DSM-5-TR includes the fully revised text and references, updated diagnostic criteria and ICD-10-CM codes since DSM-5 was published in 2013. It features a new disorder, Prolonged Grief Disorder, as well as codes for suicidal behavior available to all clinicians of any discipline without the requirement of any other diagnosis.

With contributions from over 200 subject matter experts, this updated volume boasts the most current text updates based on the scientific literature. Now in four-color and with the ability to authenticate each printed copy, DSM-5-TR provides a cohesive, updated presentation

of criteria, diagnostic codes, and text. This latest volume offers a common language for clinicians involved in the diagnosis and study of mental disorders and facilitates an objective assessment of symptom presentations across a variety of clinical settings—inpatient, outpatient, partial hospital, consultation-liaison, clinical, private practice, and primary care.

## Stay current with these important updates to DSM-5-TR™:

- Fully revised text for each disorder with updated sections on associated features, prevalence, development and course, risk and prognostic factors, culture, diagnostic markers, suicide, differential diagnosis, and more.
- Addition of Prolonged Grief Disorder (PGD) to Section II—a new disorder for diagnosis
- Over 70 modified criteria sets with helpful clarifications since publication of DSM-5
- Fully updated Introduction and Use of the Manual to guide usage and provide context for important terminology
- Considerations of the impact of racism and discrimination on mental disorders integrated into the text
- New codes to flag and monitor suicidal behavior, available to all clinicians of any discipline and without the requirement of any other diagnosis
- Fully updated ICD-10-CM codes implemented since 2013, including over 50 coding updates new to DSM-5-TR for substance intoxication and withdrawal and other disorders
- Updated and redesigned Diagnostic Classification

This manual is a valuable resource for other physicians and health professionals, including psychologists, counselors, nurses, and occupational and rehabilitation therapists, as well as social workers and forensic and legal specialists. DSM-5-TR™ is the most definitive resource for the diagnosis and classification of mental disorders.

2022 • 1,142 pages • ISBN 978-0-89042-575-6 • Hardcover • \$220.00 • Item #2575

2022 • 1,142 pages • ISBN 978-0-89042-576-3 • Paperback • \$170.00 • Item #2576

2022 • 1,142 pages • ISBN 978-0-89042-577-0 • eBook • \$136.00 • Item #2577

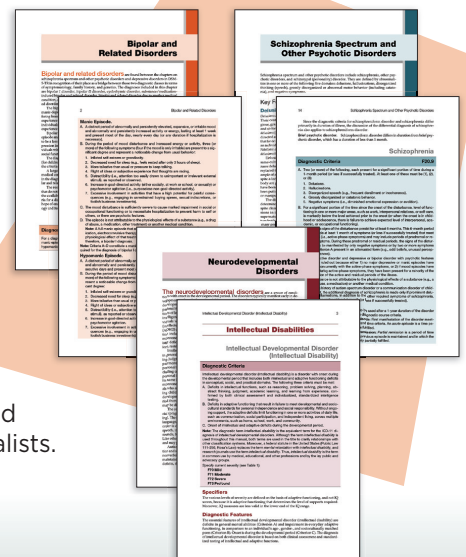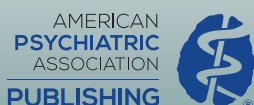

**20% Discount for American Psychiatric Association Members**

**25% Discount for APA Resident-Fellow Members**

► **ORDER @ [www.appi.org](http://www.appi.org) | Email: [appi@psych.org](mailto:appi@psych.org) | Toll Free: 1-800-368-5777**

# PSYCHIATRYonline

Your Destination for Lifelong Learning in Psychiatry

The one-stop resource for information on diagnosis, treatment, guidelines, the latest research, and breaking news from the field.

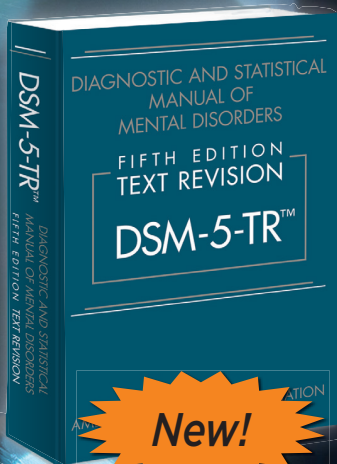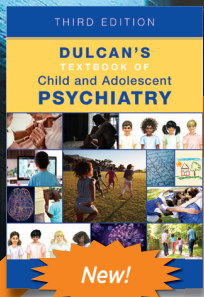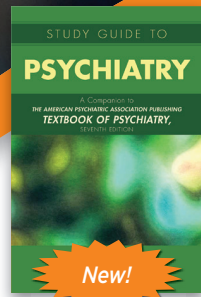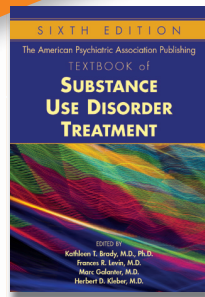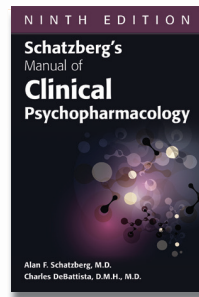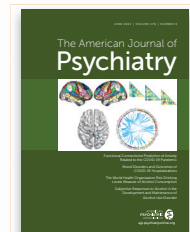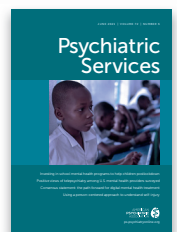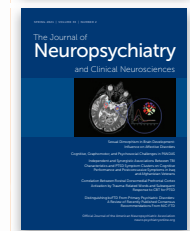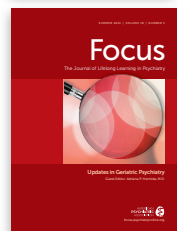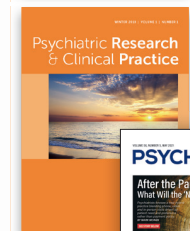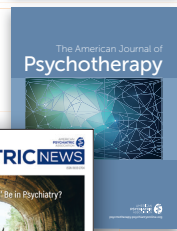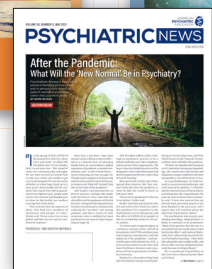

**PsychiatryOnline.org** is the platform for all American Psychiatric Association Publishing journals, *DSM-5-TR™*, and bestselling textbooks, as well as APA Practice Guidelines, and continuing medical education.

This is a one-stop resource for information on psychiatric diagnosis, treatment, guidelines, the latest research, and breaking news from the field. From a single location, users can search across all books and journals to find the most relevant content easier than ever.

Subscribe to products individually or to the DSM Select package that includes the DSM-5® library, books and select journals.

**Go to [www.appi.org](http://www.appi.org) to subscribe.**

*Institutional subscription options are available.*

*For more information contact: [institutions@psych.org](mailto:institutions@psych.org);  
800-368-5777 ext. 3729*

AMERICAN  
PSYCHIATRIC  
ASSOCIATION  
PUBLISHING   
[psychiatryonline.org](http://psychiatryonline.org)

# ▶ PODCASTS from APA Publishing

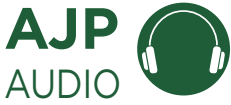

## AJP Audio

Host: Michael D. Roy, Executive Editor, *The American Journal of Psychiatry*

Each episode features an in-depth interview with an author from the most discussed article appearing in the latest issue of *The American Journal of Psychiatry*.

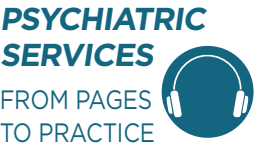

## Psychiatric Services From Pages to Practice

Hosts: Lisa Dixon, M.D., M.P.H., Editor, *Psychiatric Services*, and Josh Berezin, M.D., M.S.

Learn about the latest mental health services research published in *Psychiatric Services* and why it is relevant. Topics include community-based treatment programs, collaborative care, evidence-based treatment and service delivery, criminal and social justice, policy analysis, and more.

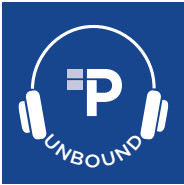

## Psychiatry Unbound

Host: Laura Roberts, M.D., M.A., Editor-in-Chief, APA Publishing Books

APA Publishing's Books podcast offers the opportunity to hear the voices behind the most prominent psychiatric scholarship in the field today. Learn about important topics in the field of psychiatry and see how our authors are making an impact in clinical settings throughout the world.

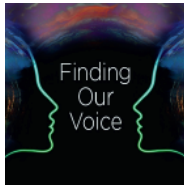

## Finding Our Voice

Host: Sanya Virani, MBBS, MPH

Finding Our Voice brings the viewpoints and opinions of the next generation of psychiatrists—including residents, fellows, and early career psychiatrists—to the forefront. Topics covered include systemic racism and social determinants.

Subscribe Today!

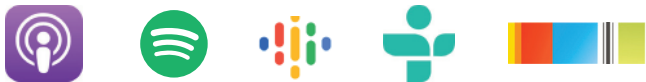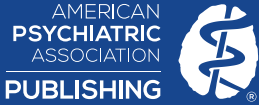

# Principal Scientist and Senior Faculty Member Mental Health and Addiction Services Research

We seek a principal scientist and senior faculty member (MD, PhD or MD/PhD) with a focus on mental health/addiction services research such as, but not limited to, the development, delivery, and/or implementation of evidence-based models of care in specialty, general medical or other settings. We welcome applicants with expertise in quantitative, qualitative, and/or mixed methods. We offer a strong, multidisciplinary collaborative environment; access to rural practice-based research networks (mental health centers, primary care, child services, aging services) spanning three states; extensive clinical settings and modalities; and the research infrastructures of centers such as the Center for Technology and Behavioral Health, WRJ VAMC, and the Dartmouth Institute. The ideal candidate would be at the Associate Professor level or higher, have an established record of extramural funding, demonstrate a commitment to mentoring, be interested in collaboration, and have an outstanding publication record commensurate with their career stage.

The Dartmouth-Hitchcock Health system stretches over New Hampshire and Vermont and offers the quintessential New England experience.

This beautiful area combines history, industry, and business and has been ranked consistently as one of the best places in the US to live and work. Anchored by the academic Dartmouth-Hitchcock Medical Center in Lebanon, NH, the system includes the NCI-designated Norris Cotton Cancer Center, the Children's Hospital at Dartmouth-Hitchcock; 5 affiliated hospitals, and 30 Dartmouth-Hitchcock ambulatory clinics across the region. With destinations like Boston, New York, Montreal, the seacoast, and ski country within driving distance, the opportunities – both career and personal – truly make New Hampshire the ideal place to work and play.

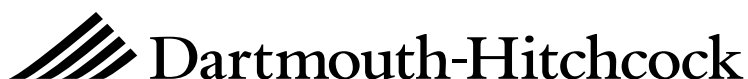

**Academic rank at the Geisel School of Medicine at Dartmouth** will be commensurate with experience and academic record of accomplishment.

**Candidates are requested to apply directly on our career site:**

**[careers.dartmouth-hitchcock.org](https://careers.dartmouth-hitchcock.org)**

**REQ #: 220000LO**

**Cover letter should be addressed to:**

**Mark L. Semiao, MBA**

*Executive Recruiter, Talent Acquisition  
Dartmouth-Hitchcock*

*Dartmouth and Dartmouth-Hitchcock are highly committed to diversity and inclusion. We are especially interested in applicants who are able to work effectively with students, faculty, staff and research participants from all backgrounds, including but not limited to: racial and ethnic minorities, women, individuals from lower income backgrounds or living in rural communities, individuals who identify with LGBTQ+ communities, veterans, and individuals with disabilities.*

## NEW TITLES in PSYCHIATRY

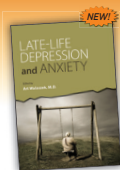

### Late-Life Depression and Anxiety

Edited by Art Walaszek, M.D.

2022 • 376 pages • ISBN 978-1-61537-347-5 • Paperback • \$69.00 • Item #37347

2022 • 376 pages • ISBN 978-1-61537-441-0 • eBook • \$55.00 • Item #37441

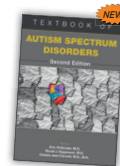

### Textbook of Autism Spectrum Disorders, Second Edition

Edited by Eric Hollander, M.D.,  
Randi Hagerman, M.D., and Casara Ferretti, M.S.

2022 • 752 pages • ISBN 978-1-61537-304-8 • Hardcover • \$115.00 • Item #37304

2022 • 752 pages • ISBN 978-1-61537-421-2 • eBook • \$85.00 • Item #37421

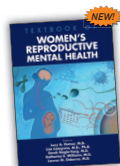

### Textbook of Women's Reproductive Mental Health

Edited by Lucy A. Hutner, M.D., Lisa A. Catapano, M.D., Ph.D.,  
Sarah M. Nagle-Yang, M.D., Katherine E. Williams, M.D.,  
and Lauren M. Osborne, M.D.

2022 • 784 pages • ISBN 978-1-61537-306-2 • Hardcover • \$135.00 • Item #37306

2022 • 784 pages • ISBN 978-1-61537-386-4 • eBook • \$108.00 • Item #37386

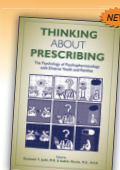

### Thinking About Prescribing The Psychology of Psychopharmacology With Diverse Youth and Families

Edited by Shashank V. Joshi, M.D., FAAP, DFAACAP,  
and Andrés Martin, M.D., M.P.H.

2022 • 395 pages • ISBN 978-1-61537-388-8 • Paperback • \$65.00 • Item #37388

2022 • 395 pages • ISBN 978-1-61537-389-5 • eBook • \$52.00 • Item #37389

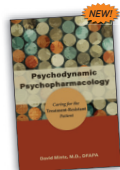

### Psychodynamic Psychopharmacology Caring for the Treatment-Resistant Patient

David Mintz, M.D.

2022 • 295 pages • ISBN 978-1-61537-152-5 • Paperback • \$62.00 • Item #37152

2022 • 295 pages • ISBN 978-1-61537-400-7 • eBook • \$49.95 • Item #37400

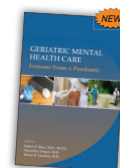

### Geriatric Mental Health Care Lessons from a Pandemic

Edited by Robert P. Roca, M.D., M.P.H., Micheline Dugue, M.D.,  
and Maria Llorente, M.D., FAPA

2022 • 384 pages • ISBN 978-1-61537-465-6 • Paperback • \$58.00 • Item #37465

2022 • 384 pages • ISBN 978-1-61537-466-3 • eBook • \$46.50 • Item #37466

AMERICAN  
PSYCHIATRIC  
ASSOCIATION  
PUBLISHING

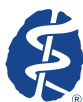

ORDER @ [www.appi.org](http://www.appi.org) | Email: [appi@psych.org](mailto:appi@psych.org) | Toll Free: 1-800-368-5777

20% Discount for American Psychiatric Association Members

25% Discount for APA Resident-Fellow Members



Searching for  
the perfect  
psychiatric  
career?

## Let APA JobCentral help!

### Manage Your Career

- Browse hundreds of active job listings!
- Create an account to save jobs, store multiple resumes and cover letters and communicate with employers through our internal messaging system.
- Set up multiple job alerts specifying your skills, interests and location to receive e-mails when employers post jobs that match your criteria.

### Recruit for Open Positions

- Post your job in front of thousands of highly qualified psychiatrists.
- Cross promote your job listing in Psychiatric News.
- Search the anonymous resume database to find your ideal candidate.

AMERICAN  
**PSYCHIATRIC**  
ASSOCIATION

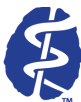

**JOBCENTRAL**  
The Career Hub for Psychiatry

[jobs.psychiatry.org](https://jobs.psychiatry.org)
