# Psychiatric Services

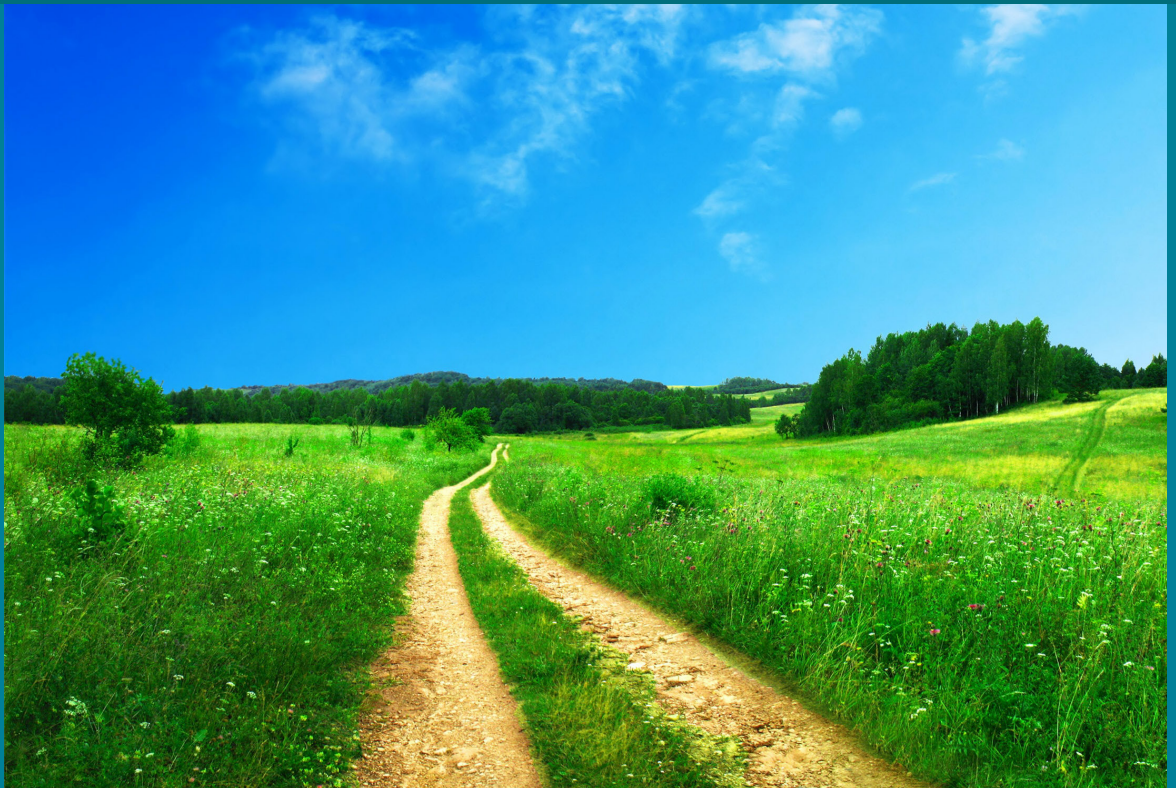

Editorial: Reporting on and reviewing for race/racialization, ethnicity, and culture  
Addiction treatment and telehealth in the pandemic: efficacy and provider insights  
U.S. variation in psychotropic medication prescription for adults with schizophrenia  
Overcoming factionalism in policy making for serious mental illness
